# Supplementary material for: Free-standing conductive hydrogel electrode for potentiometric glucose sensing
Source: Royal Society of Chemistry journal article supplement (doi:10.1039/d1ra08956k), 2022-01-01
Supplement: d1ra08956k1.pdf [file d1ra08956k1.pdf]

## Electronic Supplementary Information

### Free-standing conductive hydrogel electrode for potentiometric glucose sensing

Shogo Himori and Toshiya Sakata\*

Department of Materials Engineering, School of Engineering, The University of Tokyo, 7-3-1 Hongo, Bunkyo-ku, Tokyo 113-8656, Japan

E-mail address: sakata@biofet.t.u-tokyo.ac.jp

#### 1. Field-effect transistor (FET) potential measurement

The operation of a FET in the unsaturated region is described by the following equation S2.<sup>S1,S2</sup>

$$I_D = \mu C_{OX} \frac{W}{L} \left[ (V_G - V_T) V_D - \frac{1}{2} V_D^2 \right] \quad (S1)$$

$I_D$  is the drain current,  $\mu$  is the electron mobility in the channel,  $C_{OX}$  is the gate oxide capacitance,  $W/L$  is the channel width to channel length ratio,  $V_D$  and  $V_G$  are the applied drain-source and gate-source voltages, respectively, and  $V_T$  is the threshold voltage, which is described by the following equation S2:

$$V_T = E_{ref} - \Psi_0 + \chi^{sol} - \frac{\varphi_{si}}{q} - \frac{Q_{it} + Q_f + Q_B}{C_{OX}} + 2\varphi_f, \quad (S2)$$

Here,  $E_{ref}$  is the reference electrode potential relative to a vacuum,  $-\Psi_0 + \chi^{sol}$  describes the interfacial potential at the electrolyte/silicon dioxide interface where the factor  $\chi^{sol}$  is the surface dipole moment of the solution, which can be considered to be constant.  $\varphi_{si}$  is the electron work function of silicon,  $Q_{it}$ ,  $Q_f$ , and  $Q_B$  are the charge of the interface traps, the fixed oxide charge, and the bulk depletion charge per unit area, respectively, and  $\varphi_f$  is the Fermi potential difference between the doped bulk silicon and the intrinsic silicon.

Taking into account for the capacitance and charge of the FSC hydrogels connected to the gate electrode, equation S2 is modified to

$$V_T = E_{ref} - \Psi_0 + \chi^{sol} - \frac{\varphi_{si}}{q} - \frac{Q_{it} + Q_f + Q_B + Q_{gel}}{C_{total}} + 2\varphi_f \quad (S3)$$

with

$$C_{total} = \frac{C_{OX} C_{gel}}{C_{OX} + C_{gel}}, \quad (S4)$$

where  $Q_{gel}$  is the charge of the FSC hydrogel and  $C_{total}$  is the combined capacitance of  $C_{OX}$  and that of the FSC hydrogel electrode ( $C_{gel}$ ). The change in the interfacial potential ( $\Delta \Psi_0$ ) at

the electrolyte/hydrogel gate electrode interface was constant because the ionic concentration was stabilized by the buffer solution. The quantities  $E_{ref}$ ,  $\frac{\varphi_{sl}}{q}$ ,  $Q_{it}$ ,  $Q_f$ ,  $Q_B$ , and  $\varphi_f$  should remain unchanged by molecular binding to the hydrogel. In addition,  $\Delta V_{out}$  at the gate was measured at constant  $I_D$  assuming the source follower circuit. Therefore, the detected  $\Delta V_{out}$  was regarded as the change in  $V_{GS}$ , which equals  $-|\Delta V_T|$  at constant  $I_D$ ; then  $\Delta V_{out}$  was calculated as follows:

$$\Delta V_{out} = - \left( \left| \frac{Q_{gel}}{C_{total}} \right| - \left| \frac{Q_{gel,0}}{C_{total,0}} \right| \right), \quad (S5)$$

where  $\frac{Q_{gel,0}}{C_{total,0}}$  is the initial state of  $\frac{Q_{gel}}{C_{total}}$ . These equations S5 and S4 correspond to equations 4 and 5 in the main text.

## 2. Additional data

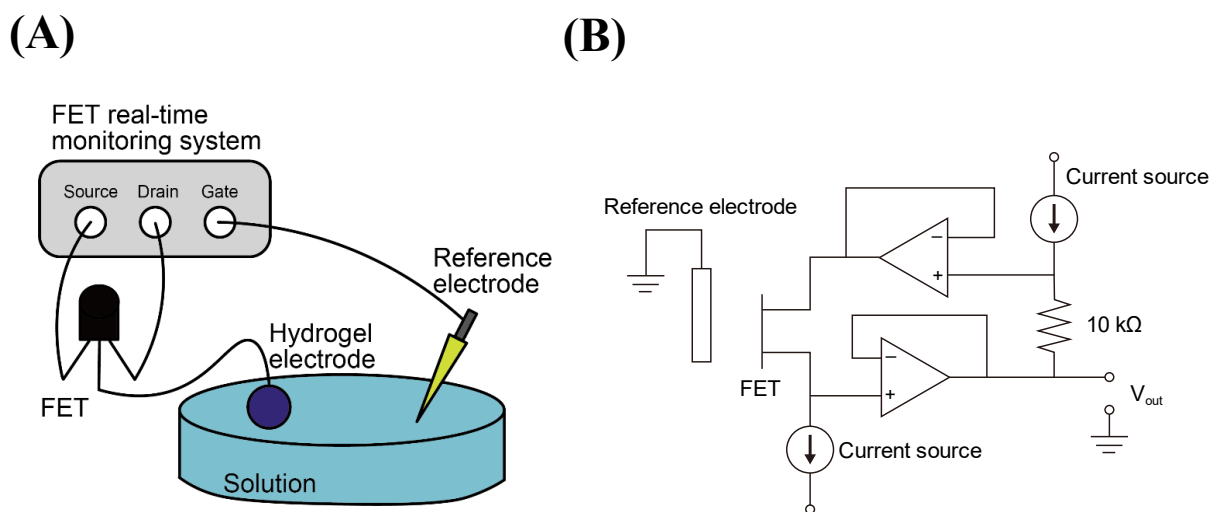

**Figure S1 (A)** Schematic of FET potential measurement system. **(B)** Electrical circuit. The change in surface potential ( $\Delta V_{out}$ ) at the gate electrode was measured at a constant  $I_D$  (700  $\mu$ A) and  $V_G$  (0 V) using the source follower circuit.

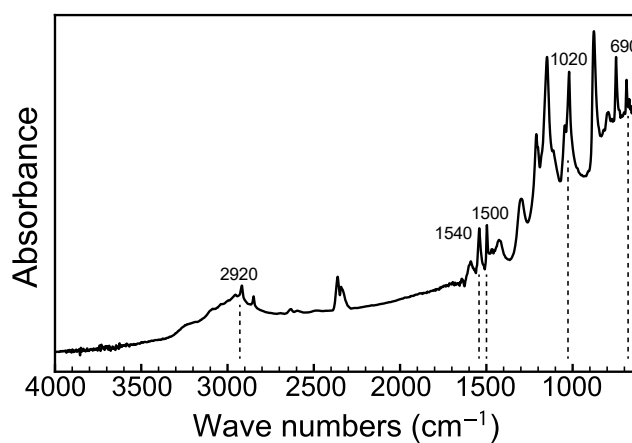

**Figure S2** ATR-FTIR spectra of P(ANI-APBA)-PVA-based FSC hydrogel.

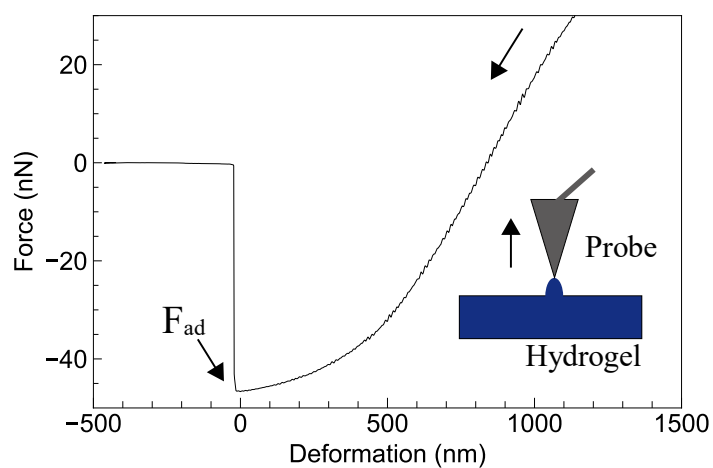

**Figure S3** Retraction force curve on FSC hydrogels in PBS. The curve was analyzed using the Johnson–Kendall–Roberts model (equation 2).

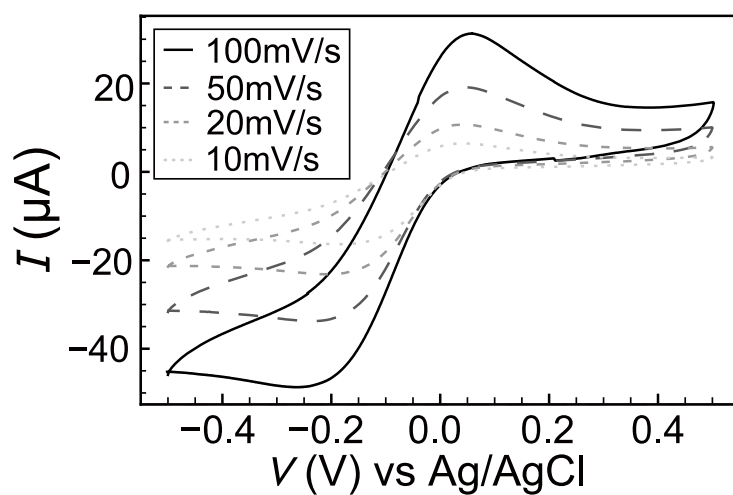

**Figure S4** Cyclic voltammogram at scan rates of 10–100 mV/s. The hydrogel with the PVA ratio of 2 was used.

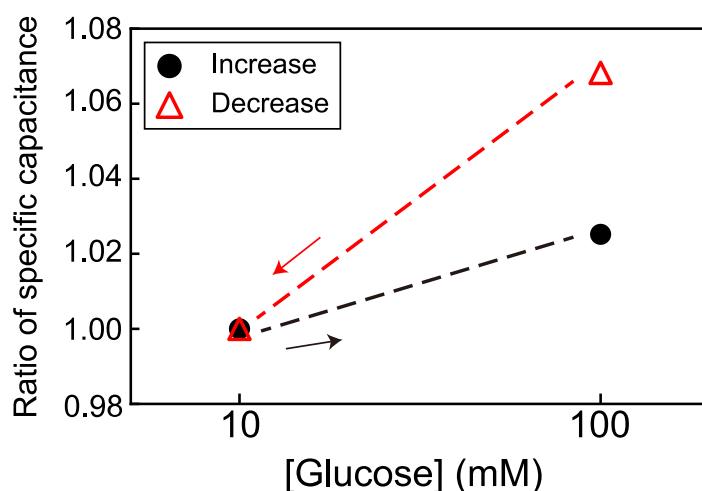

**Figure S5** Ratio of specific capacitance depending on glucose concentration in PBS. Each specific capacitance was taken as a ratio to that of 10 mM glucose. Specific capacitance was calculated from the result of CV ( $-0.3$ – $+0.9$  V vs Ag/AgCl, 50 mV/s) with equation 1. Black circle, increasing concentration; red triangle, decreasing concentration.

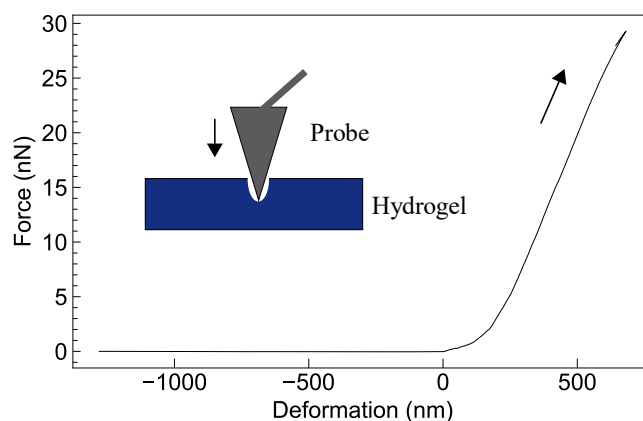

**Figure S6** Approach force curve on FSC hydrogels in PBS. The curve was analyzed using the Hertz model (equation 5).

## References

- S1 T. Masuda, T. Kajisa, A. M. Akimoto, A. Fujita, K. Nagase, T. Okano, T. Sakata and R. Yoshida, *RSC Adv.*, 2017, **7**, 34517–34521.
- S2 T. Kajisa, W. Li, T. Michinobu and T. Sakata, *Biosens. Bioelectron.*, 2018, **117**, 810–817.
